# Supplementary material
Source: Frontiers journal article supplement (https://www.frontiersin.org/articles/147528)
Supplement: Data_Sheet_1.XLSX [file Data_Sheet_1.XLSX]

## Sheet: Sheet1
Core centimeter	Lake	decay corrected 137Cs values (dpm/g)	year
1	Arungen	6.64983	2013
2	Arungen	7.09497	2011.42
3	Arungen	7.06488	2009.84
4	Arungen	7.68116	2008.26
5	Arungen	9.7358	2006.68
6	Arungen	7.85263	2005.1
7	Arungen	7.31293	2003.52
8	Arungen	6.77708	2001.94
9	Arungen	8.39006	2000.36
10	Arungen	7.25265	1998.78
11	Arungen	7.5	1997.2
12	Arungen	7.61618	1995.62
13	Arungen	7.39921	1994.04
14	Arungen	7.53717	1992.46
15	Arungen	6.14833	1990.88
16	Arungen	7.53745	1989.3
17	Arungen	8.26778	1987.72
18	Arungen	23.9978	1986.14
19	Arungen	15.1075	1984.56
20	Arungen	8.12749	1982.98
21	Arungen	6.27046	1981.4
22	Arungen	5.31685	1979.82
23	Arungen	6.32955	1978.24
24	Arungen	7.55208	1976.66
25	Arungen	7.56757	1975.08
26	Arungen	5.69571	1973.5
27	Arungen	7.41433	1971.92
28	Arungen	4.49477	1970.34
29	Arungen	7.40397	1968.76
30	Arungen	8.64916	1967.18
31	Arungen	6.37883	1965.6
32	Arungen	6.19279	1964.02
33	Arungen	6.57651	1962.44
34	Arungen	9.61296	1960.86
35	Arungen	8.34395	1959.28
36	Arungen	6.49446	1957.7
37	Arungen	5.95798	1956.12
38	Arungen	7.03947	1954.54
39	Arungen	5.96215	1952.96
40	Arungen	5.74367	1951.38
41	Arungen	5.76792	1949.8
42	Arungen	5.2502	1948.22
43	Arungen	5.17815	1946.64
44	Arungen	4.42857	1945.06
45	Arungen	4.699	1943.48
46	Arungen	5.5939	1941.9
47	Arungen	4.02851	1940.32
48	Arungen	4.99623	1938.74
49	Arungen	5.09155	1937.16
50	Arungen	4.55539	1935.58
51	Arungen	4.37898	1934
1	Bjorkelangen	23.2	2012
2	Bjorkelangen	13.2	2010
3	Bjorkelangen	22.6	2008
4	Bjorkelangen	26.7	2005
5	Bjorkelangen	33.3	2003
6	Bjorkelangen	33.2	2001
7	Bjorkelangen	35.9	1999
8	Bjorkelangen	57.7	1997
9	Bjorkelangen	51.8	1994
10	Bjorkelangen	46.3	1992
11	Bjorkelangen	50.6	1990
12	Bjorkelangen	44.9	1988
13	Bjorkelangen	90.6	1986
14	Bjorkelangen	38.6	1983
15	Bjorkelangen	25.7	1981
16	Bjorkelangen	35.2	1979
17	Bjorkelangen	28	1977
18	Bjorkelangen	30.3	1975
19	Bjorkelangen	35.4	1972
20	Bjorkelangen	43.4	1970
21	Bjorkelangen	38.3	1968
22	Bjorkelangen	23.3	1966
23	Bjorkelangen	35.5	1964
24	Bjorkelangen	40.9	1961
25	Bjorkelangen	38.7	1959
26	Bjorkelangen	28.7	1957
27	Bjorkelangen	27.2	1955
28	Bjorkelangen	26.3	1953
29	Bjorkelangen	18.4	1950
30	Bjorkelangen	48.6	1948
31	Bjorkelangen	16.2	1946
32	Bjorkelangen	28.8	1944
33	Bjorkelangen	23.8	1942
34	Bjorkelangen	26	1939
35	Bjorkelangen	23.5	1937
36	Bjorkelangen	37.9	1935
1	Gjersjoen	8.74525	2013
2	Gjersjoen	7.525	2010
3	Gjersjoen	7.83037	2007
4	Gjersjoen	9.30147	2004
5	Gjersjoen	9.49343	2001
6	Gjersjoen	9.92352	1998
7	Gjersjoen	10.9697	1995
8	Gjersjoen	11.1418	1992
9	Gjersjoen	12.5116	1989
10	Gjersjoen	15.0867	1986
11	Gjersjoen	13.0873	1983
12	Gjersjoen	7.94661	1980
13	Gjersjoen	7.07424	1977
14	Gjersjoen	4.42675	1974
15	Gjersjoen	4.96689	1971
16	Gjersjoen	3.75969	1968
17	Gjersjoen	2.29167	1965
18	Gjersjoen	3.64238	1962
19	Gjersjoen	5.54517	1959
20	Gjersjoen	2.07865	1956
21	Gjersjoen	3.57143	1953
22	Gjersjoen	7.22222	1950
23	Gjersjoen	7.13141	1947
24	Gjersjoen	7.73142	1944
25	Gjersjoen	9.1687	1941
26	Gjersjoen	8.08878	1938
27	Gjersjoen	6.01655	1935
28	Gjersjoen	5.2549	1932
29	Gjersjoen	4.97343	1929
30	Gjersjoen	4.64141	1926
31	Gjersjoen	4.45799	1923
32	Gjersjoen	4.70423	1920
33	Gjersjoen	5.20392	1917
34	Gjersjoen	4.47947	1914
35	Gjersjoen	4.81303	1911
36	Gjersjoen	4.62385	1908
37	Gjersjoen	4.68787	1905
38	Gjersjoen	4.52381	1902
39	Gjersjoen	5.1	1899
40	Gjersjoen	4.33544	1896
41	Gjersjoen	3.84892	1893
42	Gjersjoen	5.8075	1890
43	Gjersjoen	5.51075	1887
44	Gjersjoen	3.56036	1884
45	Gjersjoen	3.42278	1881
46	Gjersjoen	3.2852	1878
47	Gjersjoen	3.14762	1875
48	Gjersjoen	3.01005	1872
49	Gjersjoen	2.87247	1869
50	Gjersjoen	2.73489	1866
1	Halandsvatnet	16.7949	2014
2	Halandsvatnet	23.1897	2013
3	Halandsvatnet	22.7835	2012
4	Halandsvatnet	25.8025	2011
5	Halandsvatnet	26.9643	2010
6	Halandsvatnet	19.0845	2009
7	Halandsvatnet	17.9188	2008
8	Halandsvatnet	9.02299	2007
9	Halandsvatnet	10.4032	2006
10	Halandsvatnet	19.5812	2005
11	Halandsvatnet	17.4857	2004
12	Halandsvatnet	14.3363	2003
13	Halandsvatnet	17.5781	2002
14	Halandsvatnet	11.9342	2001
15	Halandsvatnet	16.1538	2000
16	Halandsvatnet	18.5789	1999
17	Halandsvatnet	15.098	1998
18	Halandsvatnet	16.5	1997
19	Halandsvatnet	14.6667	1996
20	Halandsvatnet	11.8182	1995
21	Halandsvatnet	16.2871	1994
22	Halandsvatnet	17.3529	1993
23	Halandsvatnet	17.1014	1992
24	Halandsvatnet	14.8571	1991
25	Halandsvatnet	17.372	1990
26	Halandsvatnet	17.4043	1989
27	Halandsvatnet	10.1105	1988
28	Halandsvatnet	6.95402	1987
29	Halandsvatnet	9.44238	1986
30	Halandsvatnet	7.73279	1985
31	Halandsvatnet	5.98086	1984
32	Halandsvatnet	7.20307	1983
33	Halandsvatnet	7.1223	1982
34	Halandsvatnet	5.7377	1981
35	Halandsvatnet	7.30769	1980
36	Halandsvatnet	4.91453	1979
37	Halandsvatnet	9.58763	1978
38	Halandsvatnet	6.65399	1977
39	Halandsvatnet	6.06383	1976
40	Halandsvatnet	2.82443	1975
41	Halandsvatnet	5.76642	1974
42	Halandsvatnet	4.61783	1973
43	Halandsvatnet	7.52212	1972
44	Halandsvatnet	4.91573	1971
45	Halandsvatnet	6.35452	1970
46	Halandsvatnet	3.64384	1969
47	Halandsvatnet	4.12417	1968
48	Halandsvatnet	3.5426	1967
49	Halandsvatnet	5.11682	1966
50	Halandsvatnet	4.89736	1965
51	Halandsvatnet	3.12217	1964
1	Helgetjern	11.7571	2014
2	Helgetjern	12.1279	2011.45
3	Helgetjern	11.9614	2008.9
4	Helgetjern	12.0874	2006.35
5	Helgetjern	10.7143	2003.8
6	Helgetjern	12.1508	2001.25
7	Helgetjern	10.2151	1998.7
8	Helgetjern	12.1854	1996.15
9	Helgetjern	11.3693	1993.6
10	Helgetjern	7.95618	1991.05
11	Helgetjern	9.025	1988.5
12	Helgetjern	18.5604	1985.95
13	Helgetjern	8.14181	1983.4
14	Helgetjern	8.68458	1980.85
15	Helgetjern	5.60355	1978.3
16	Helgetjern	7.06068	1975.75
17	Helgetjern	5.6415	1973.2
18	Helgetjern	5.9168	1970.65
19	Helgetjern	3.86745	1968.1
20	Helgetjern	2.38231	1965.55
21	Helgetjern	0.557491	1963
22	Helgetjern	4.81577	1960.45
23	Helgetjern	3.92057	1957.9
24	Helgetjern	6.7015	1955.35
25	Helgetjern	4.35165	1952.8
26	Helgetjern	3.71784	1950.25
27	Helgetjern	1.11669	1947.7
28	Helgetjern	2.56908	1945.15
29	Helgetjern	1.65272	1942.6
30	Helgetjern	0.844547	1940.05
31	Helgetjern	0	1937.5
32	Helgetjern	1.53458	1934.95
33	Helgetjern	0	1932.4
34	Helgetjern	0	1929.85
35	Helgetjern	1.09594	1927.3
36	Helgetjern	2.49323	1924.75
37	Helgetjern	3.57466	1922.2
38	Helgetjern	0.421504	1919.65
39	Helgetjern	1.27643	1917.1
40	Helgetjern	1.31564	1914.55
41	Helgetjern	0.163026	1912
42	Helgetjern	0.609013	1909.45
43	Helgetjern	2.06444	1906.9
44	Helgetjern	2.20862	1904.35
45	Helgetjern	0.995098	1901.8
46	Helgetjern	1.60135	1899.25
47	Helgetjern	1.55699	1896.7
48	Helgetjern	0	1894.15
49	Helgetjern	2.85637	1891.6
50	Helgetjern	1.98213	1889.05
51	Helgetjern	0	1886.5
52	Helgetjern	0	1883.95
53	Helgetjern	0	1881.4
54	Helgetjern	0	1878.85
55	Helgetjern	0	1876.3
56	Helgetjern	0	1873.75
57	Helgetjern	0	1871.2
58	Helgetjern	0	1868.65
59	Helgetjern	0	1866.1
60	Helgetjern	0	1863.55
61	Helgetjern	0	1861
62	Helgetjern	0	1858.45
63	Helgetjern	0	1855.9
64	Helgetjern	0	1853.35
65	Helgetjern	0	1850.8
66	Helgetjern	0	1848.25
0	Kolbotnvannet	3.99429	2013
1	Kolbotnvannet	4.34783	2011.58
2	Kolbotnvannet	14.9231	2010.16
3	Kolbotnvannet	6.57143	2008.74
4	Kolbotnvannet	11.2587	2007.32
5	Kolbotnvannet	8.98876	2005.9
6	Kolbotnvannet	8.95706	2004.48
7	Kolbotnvannet	11.5976	2003.06
8	Kolbotnvannet	8.23204	2001.64
9	Kolbotnvannet	8.19672	2000.22
10	Kolbotnvannet	7.03704	1998.8
11	Kolbotnvannet	6.48241	1997.38
12	Kolbotnvannet	6.26866	1995.96
13	Kolbotnvannet	10.0455	1994.54
14	Kolbotnvannet	12.2917	1993.12
15	Kolbotnvannet	14.6996	1991.7
16	Kolbotnvannet	13.7692	1990.28
17	Kolbotnvannet	15.515	1988.86
18	Kolbotnvannet	25.8649	1987.44
19	Kolbotnvannet	32.6543	1986.02
20	Kolbotnvannet	8.85621	1984.6
21	Kolbotnvannet	5.46053	1983.18
22	Kolbotnvannet	6.35379	1981.76
23	Kolbotnvannet	5	1980.34
24	Kolbotnvannet	7.29032	1978.92
25	Kolbotnvannet	11.2615	1977.5
26	Kolbotnvannet	14.0117	1976.08
27	Kolbotnvannet	10.8209	1974.66
28	Kolbotnvannet	6.45238	1973.24
29	Kolbotnvannet	5.45455	1971.82
30	Kolbotnvannet	5.3139	1970.4
31	Kolbotnvannet	4.94715	1968.98
32	Kolbotnvannet	3.1875	1967.56
33	Kolbotnvannet	4.59016	1966.14
34	Kolbotnvannet	3.63636	1964.72
35	Kolbotnvannet	3.56459	1963.3
36	Kolbotnvannet	3.79668	1961.88
37	Kolbotnvannet	4.05959	1960.46
38	Kolbotnvannet	4.74245	1959.04
39	Kolbotnvannet	3.99351	1957.62
40	Kolbotnvannet	4.2915	1956.2
41	Kolbotnvannet	4.96183	1954.78
42	Kolbotnvannet	4.73837	1953.36
43	Kolbotnvannet	3.98241	1951.94
44	Kolbotnvannet	3.73114	1950.52
45	Kolbotnvannet	5.86074	1949.1
46	Kolbotnvannet	3.63395	1947.68
47	Kolbotnvannet	3.18966	1946.26
48	Kolbotnvannet	2.29299	1944.84
49	Kolbotnvannet	3.17961	1943.42
50	Kolbotnvannet	4.27083	1942
1	Steinsfjorden	16.6645	2013
2	Steinsfjorden	20.4971	2006.3
3	Steinsfjorden	27.6494	1999.6
4	Steinsfjorden	32.8148	1992.9
5	Steinsfjorden	25.9839	1986.2
6	Steinsfjorden	15.8947	1979.5
7	Steinsfjorden	13.0275	1972.8
8	Steinsfjorden	13.3692	1966.1
9	Steinsfjorden	12.9682	1959.4
10	Steinsfjorden	8.1762	1952.7
11	Steinsfjorden	5.4389	1946
12	Steinsfjorden	6.47287	1939.3
13	Steinsfjorden	6.85221	1932.6
14	Steinsfjorden	6.24398	1925.9
15	Steinsfjorden	5.78745	1919.2
16	Steinsfjorden	4.9537	1912.5
17	Steinsfjorden	5.69721	1905.8
18	Steinsfjorden	5.01608	1899.1
19	Steinsfjorden	4.791	1892.4
20	Steinsfjorden	5.04808	1885.7
21	Steinsfjorden	5.0411	1879
22	Steinsfjorden	5.76962	1872.3
23	Steinsfjorden	6.0396	1865.6
24	Steinsfjorden	5.22373	1858.9
25	Steinsfjorden	5.47401	1852.2
26	Steinsfjorden	5.21033	1845.5
27	Steinsfjorden	5.05143	1838.8
28	Steinsfjorden	4.35484	1832.1
29	Steinsfjorden	5.12646	1825.4
30	Steinsfjorden	5.17308	1818.7
31	Steinsfjorden	5.57208	1812
32	Steinsfjorden	5.2452	1805.3
33	Steinsfjorden	4.7065	1798.6
34	Steinsfjorden	4.86782	1791.9
35	Steinsfjorden	4.91356	1785.2
36	Steinsfjorden	5.47206	1778.5
37	Steinsfjorden	5.60523	1771.8
38	Steinsfjorden	5.36082	1765.1
39	Steinsfjorden	4.93458	1758.4
40	Steinsfjorden	4.84071	1751.7
41	Steinsfjorden	5.80952	1745
42	Steinsfjorden	5.02508	1738.3
43	Steinsfjorden	5.14143	1731.6
44	Steinsfjorden	4.8041	1724.9
45	Steinsfjorden	5.55429	1718.2
46	Steinsfjorden	5.32847	1711.5
47	Steinsfjorden	5.47826	1704.8
48	Steinsfjorden	5.47729	1698.1
49	Steinsfjorden	4.46735	1691.4
50	Steinsfjorden	4.67949	1684.7
